# Supplementary material for: Tumor Tissue MIR92a and Plasma MIRs21 and 29a as Predictive Biomarkers Associated with Clinicopathological Features and Surgical Resection in a Prospective Study on Colorectal Cancer Patients
Source: PubMed Central journal article supplement (PMC7465950; doi:10.3390/jcm9082509), 2020-08-04
Supplement: jcm-09-02509-s001.pdf [file jcm-09-02509-s001.pdf]

# Supplementary Materials: Tumor Tissue MIR92a and Plasma MIRs21 and 29a as Predictive Biomarkers Associated with Clinicopathological Features and Surgical Resection in a Prospective Study on Colorectal Cancer Patients

Masahiro Fukada, Nobuhisa Matsushashi, Takao Takahashi, Nobuhiko Sugito, Kazuki Heishima, Yukihiko Akao and Kazuhiro Yoshida

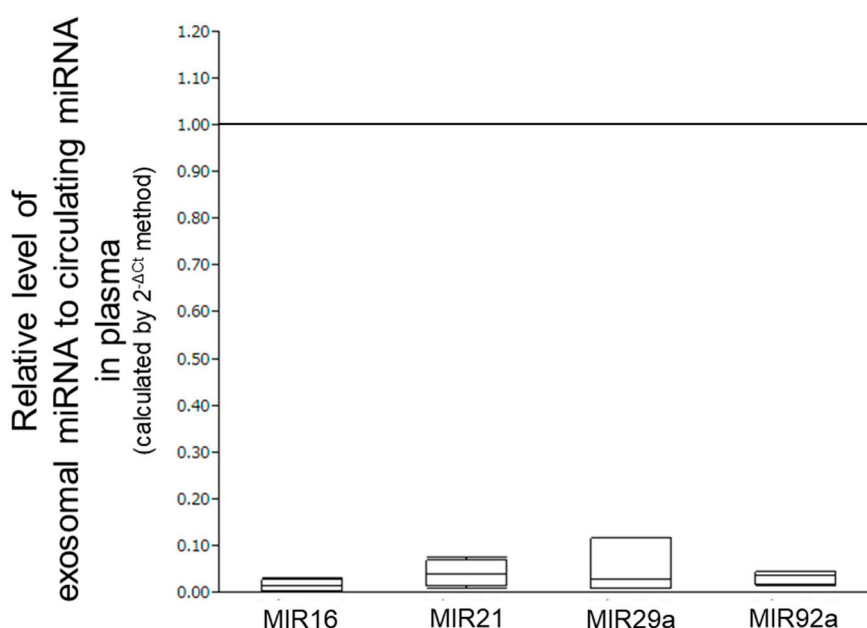

**Figure S1.** Relative levels of exosomal miRNAs to circulating miRNAs in plasma (MIRs 16, 21, 29a, and 92a).

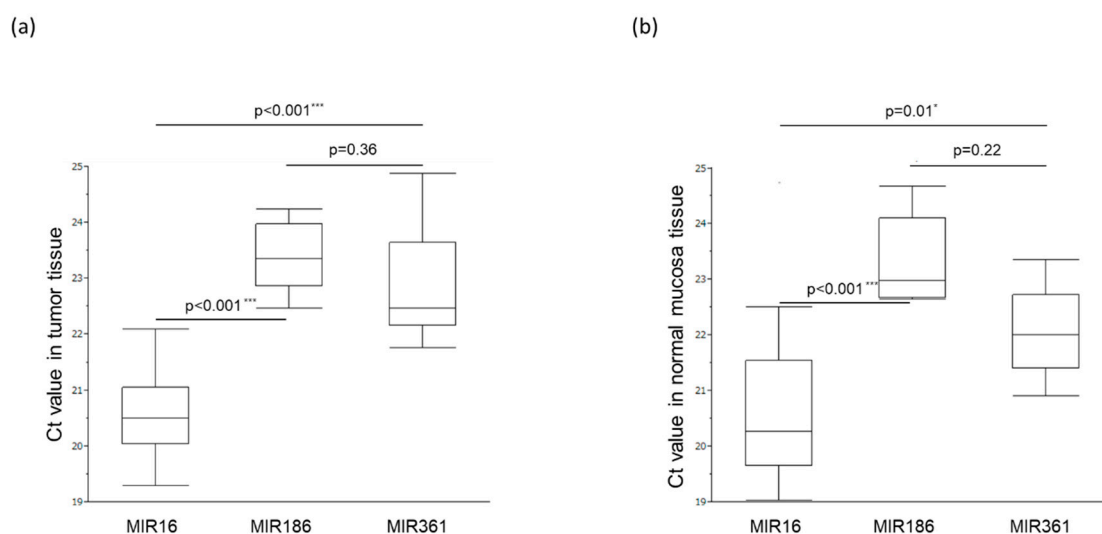

**Figure S2.** (a) Levels of MIRs16, 186, and 361 in tumor tissue from 12 CRC patients. (b) Levels of MIRs16, 186, and 361 in normal mucosa tissue of 12 CRC patients. ANOVA followed by Turkey Kramer test was performed for comparisons between groups of MIRs tested.

**Table S1.** Levels of MIR16, 186, and 361 in colorectal tumor and normal mucosa tissues.

|                               | Target MicroRNAs    |                 |                     |                 |                     |                 |
|-------------------------------|---------------------|-----------------|---------------------|-----------------|---------------------|-----------------|
|                               | MIR16               |                 | MIR186              |                 | MIR361              |                 |
|                               | Ct value            | <i>p</i> -value | Ct value            | <i>p</i> -value | Ct value            | <i>p</i> -value |
| Tumor, median (range)         | 20.49 (19.29–22.42) | 0.76            | 23.55 (22.47–25.11) | 0.86            | 22.54 (21.76–27.00) | 0.23            |
| Normal mucosa, median (range) | 20.32 (19.02–25.20) |                 | 23.10 (22.64–26.84) |                 | 22.04 (20.91–29.81) |                 |

Ct value: Threshold cycle value.

**Table S2.** Levels of MIR21, 29a, and 92a in colorectal tumor and normal mucosa tissues.

|                               | Target MicroRNAs |                 |                   |                 |                   |                 |
|-------------------------------|------------------|-----------------|-------------------|-----------------|-------------------|-----------------|
|                               | MIR21            |                 | MIR29a            |                 | MIR92a            |                 |
|                               | –ΔCt value‡      | <i>p</i> -value | –ΔCt value‡       | <i>p</i> -value | –ΔCt value‡       | <i>p</i> -value |
| Tumor, median (range)         | 2.58 (1.51–5.91) | <0.001***       | 1.24 (–0.44–5.75) | <0.001***       | 1.03 (–0.82–3.87) | <0.001***       |
| Normal mucosa, median (range) | 1.30 (0.11–5.07) |                 | 0.60 (–0.91–5.68) |                 | 0.00 (–0.67–3.62) |                 |

‡: –ΔCt value= –(Ct value (target MIR)–Ct value (internal control MIR16)), \*\*\*: *p* < 0.001.
